# Supplementary material for: The C-terminus of the cargo receptor Erv14 affects COPII vesicle formation and cargo delivery
Source: Oxford University Press journal article supplement (doi:10.1242/jcs.260527), 2023-01-18
Supplement: jcs260527supp.pdf [file jcs260527supp.pdf]

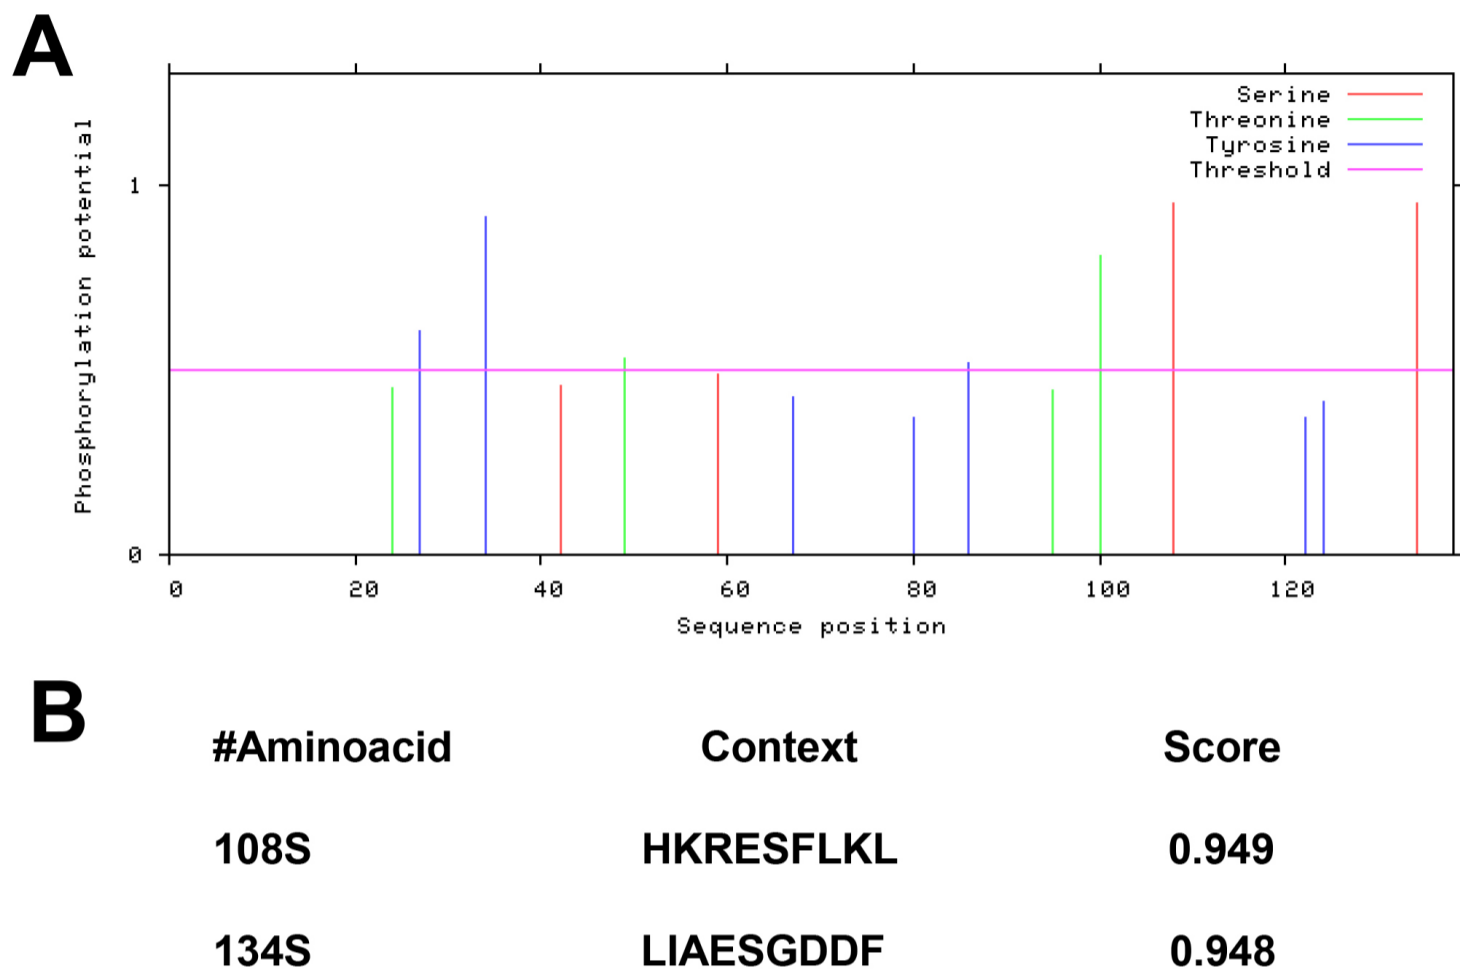

**Fig. S1. Search of putative phosphorylation sites using Netphos 3.1.**

**A).** The plot shows predicted phosphorylation sites in the Erv14 sequence. **B).** The two possible phosphorylatable Serine residues and their sequence consensus.

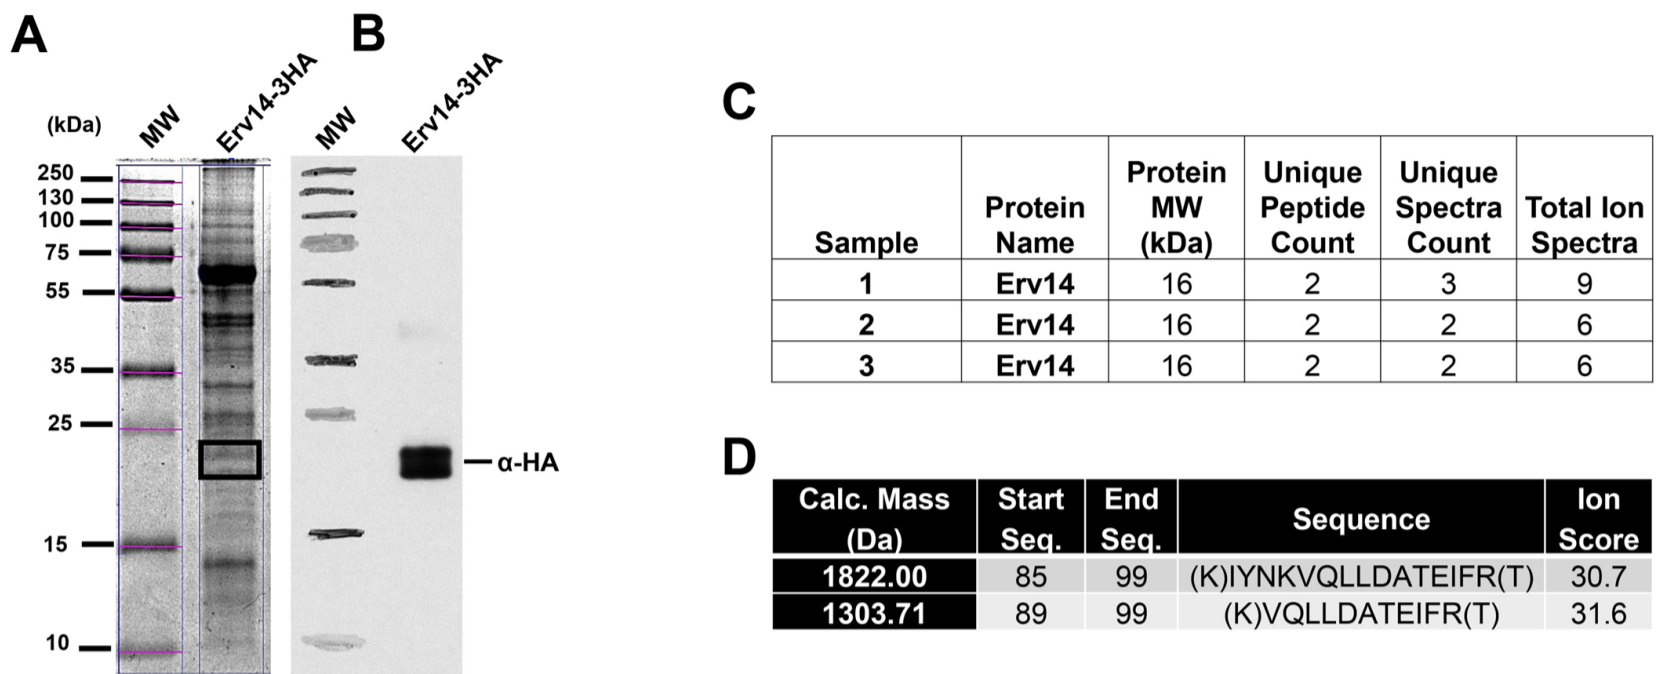

**Fig. S2. Search for phosphorylation sites by LC-MS/MS.** **A)** SDS-PAGE gel showing the selected area (square). **B)** Western blot developed with ( $\alpha$ -HA) antibody. **C)** Table showing the number of peptides identified and the number of total spectra obtained by LC-MS/MS. **D)** Properties of the identified peptides.

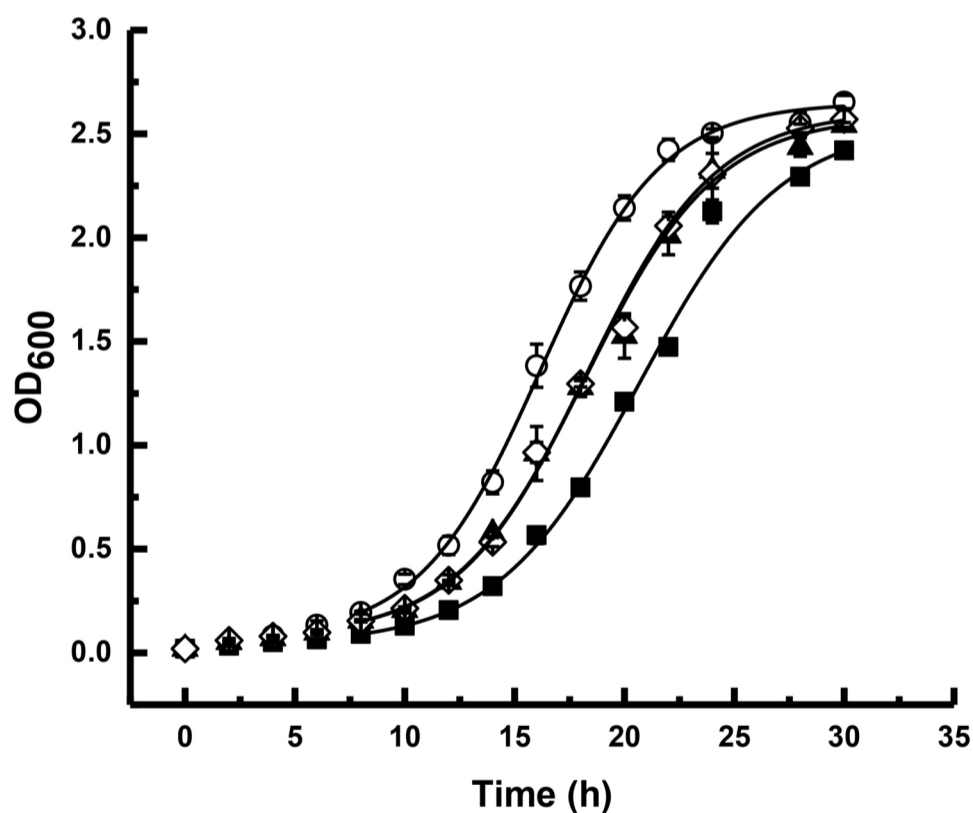

**Fig. S3. Cell growth curve from BY4741erv14 $\Delta$  strain expressing wild type Erv14 and mutants.** (○) Wild type Erv14, (▲) Dephosphorylated form Erv14<sup>S134A</sup>, (◇) Phosphomimetic form Erv14<sup>S134D</sup>, (■) Empty vector pDR-F1.

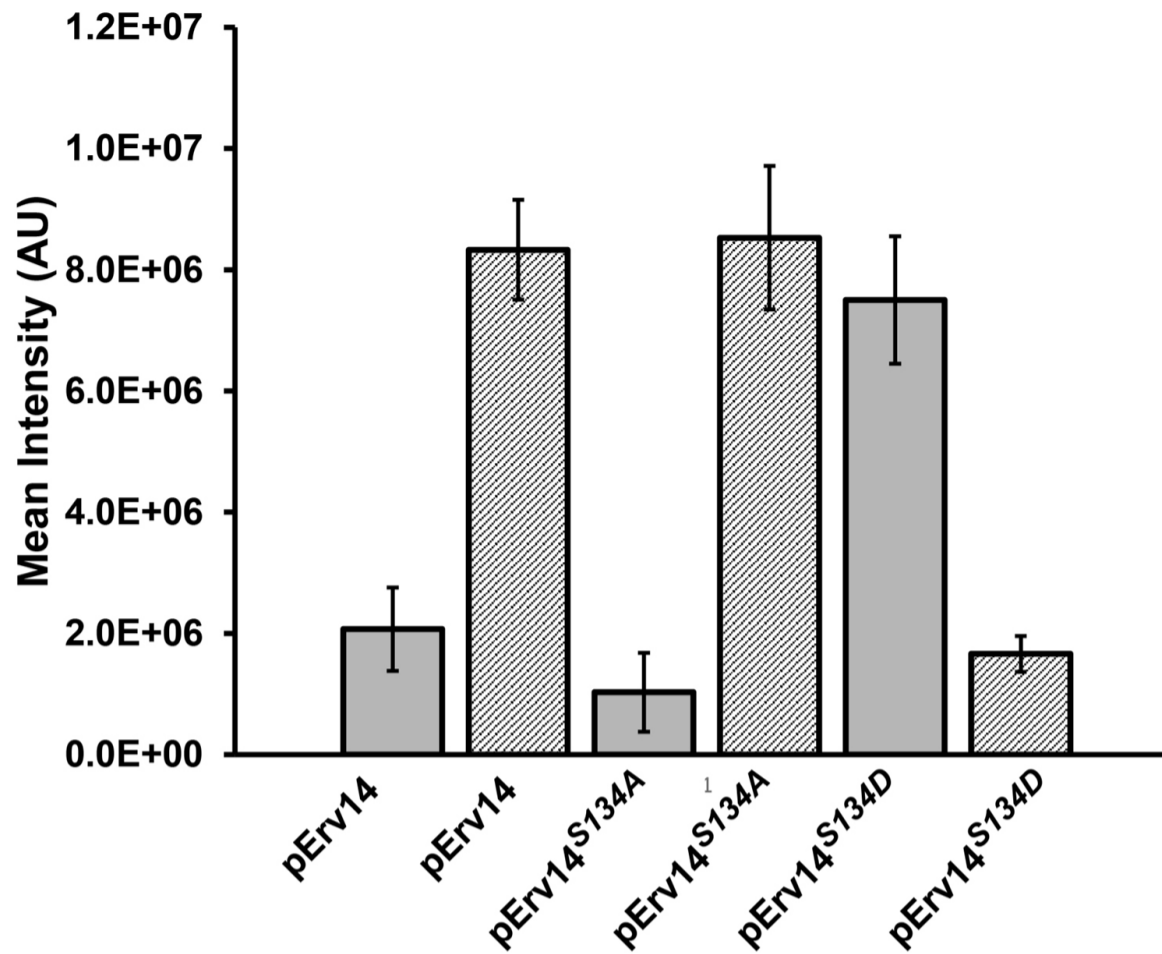

**Fig. S4. Quantification of band intensities from Figure 2B.** Intensities from the bands corresponding to the recognition of Nha1-GFP in the ER (grey bars) or PM/GA (hatched bars) by the anti-GFP antibody from yeast cells co-transformed with the *ERV14* or the corresponding mutant. Data are the mean  $\pm$  SD from three different preparations.

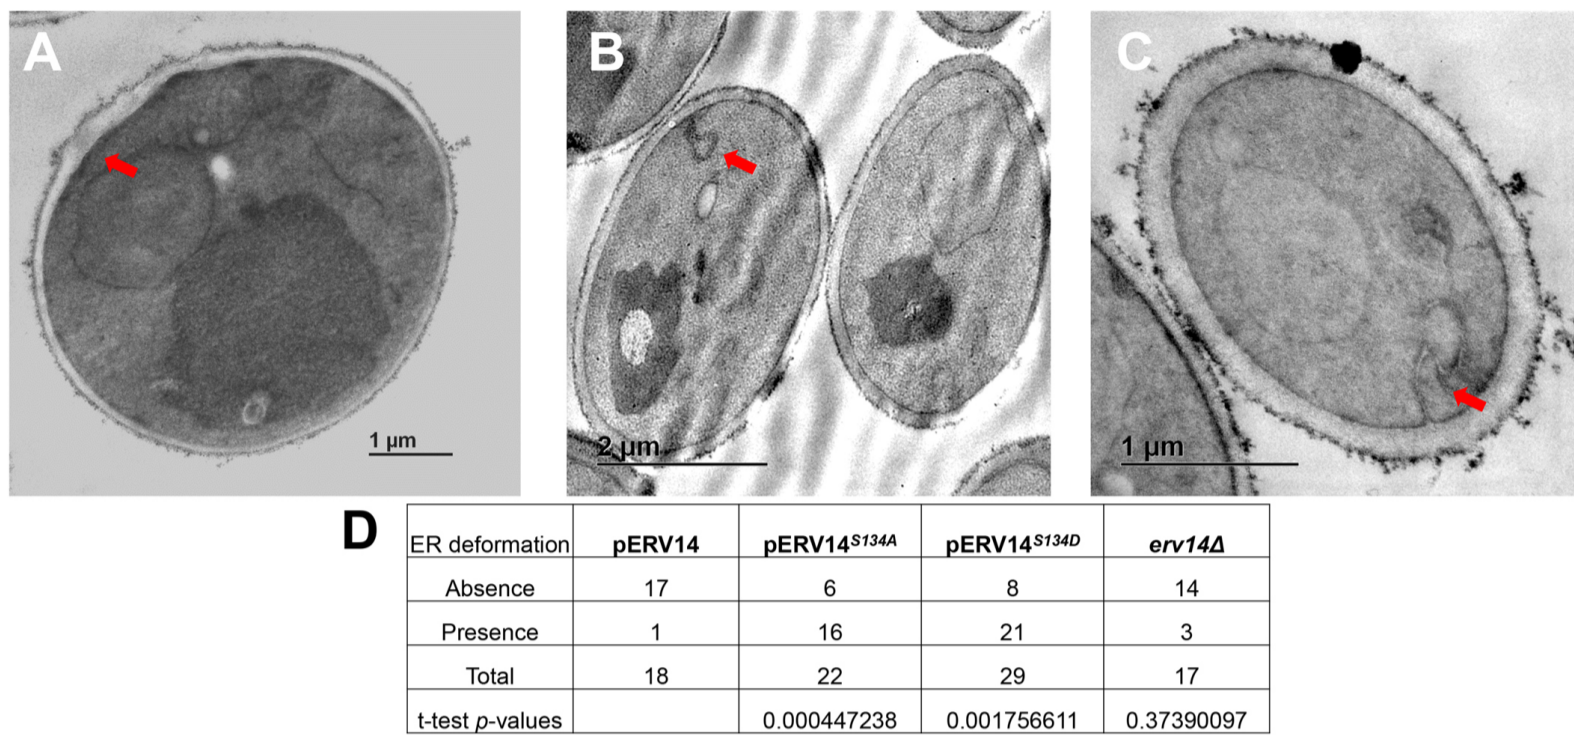

**Fig. S5. Mutations at Ser-134 modifies ER structure.** TEM micrographs from BY4741erv14Δ cells expressing Erv14 or the mutants Erv14S134A, or Erv14S134D. **(A)** In Erv14p expressing cells the cortical ER was observed as a continuous thread closely attached to the PM. In cells expressing the mutants Erv14S134A (red arrow) **(B)** or Erv14<sup>S134D</sup> **(C)**, cortical ER showed deformation in omega like structures. **(D)** Table showing the number of cell with omega-like or without ER modification. The t-test Student analysis was used to compare each mutant to wild type with *p* values: ns, *p*>0.05, significant *p*<0.05, highly significant *p*<0.001.

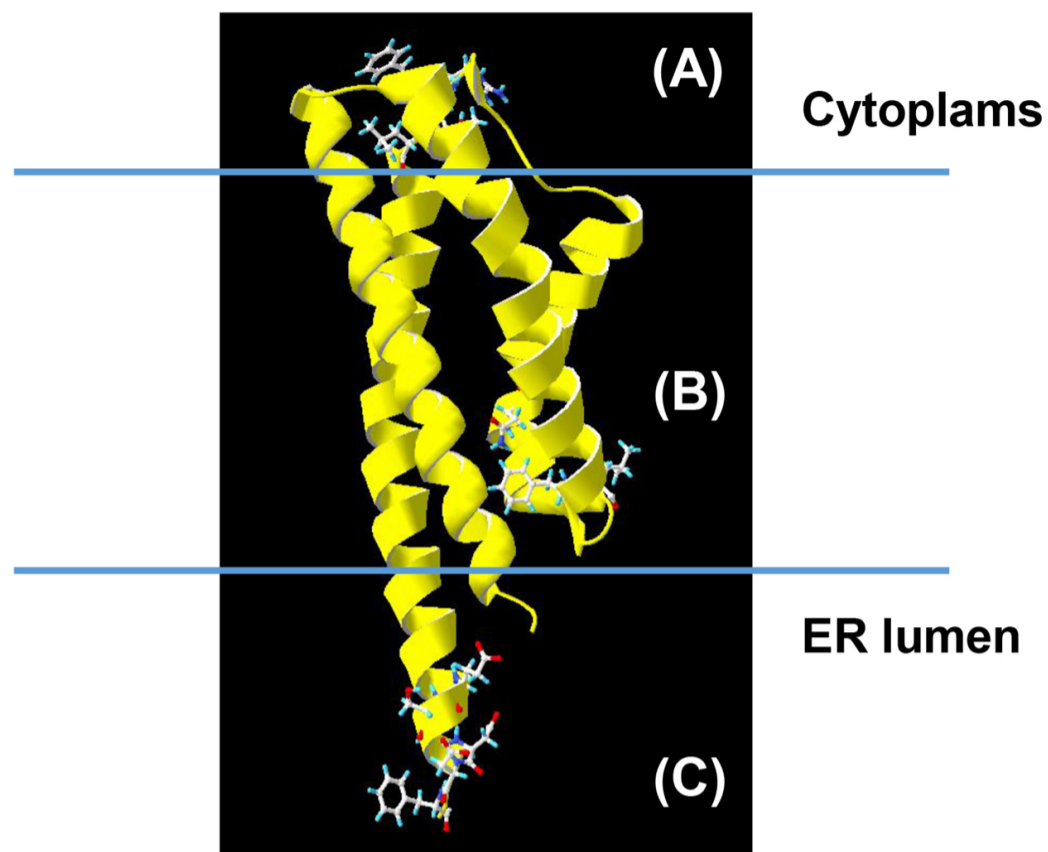

**Fig. S6. Erv14/cornichon molecular model obtained with the Alphafold2 algorithm.** Erv14 was predicted to possess four membrane spanning helices with the C and N termini facing the ER lumen. **A)** The COPII-binding site (IFRTL); **B)** Cargo-binding site; **C)** Possible phosphorylation domain. The position of the membrane limits is approximate

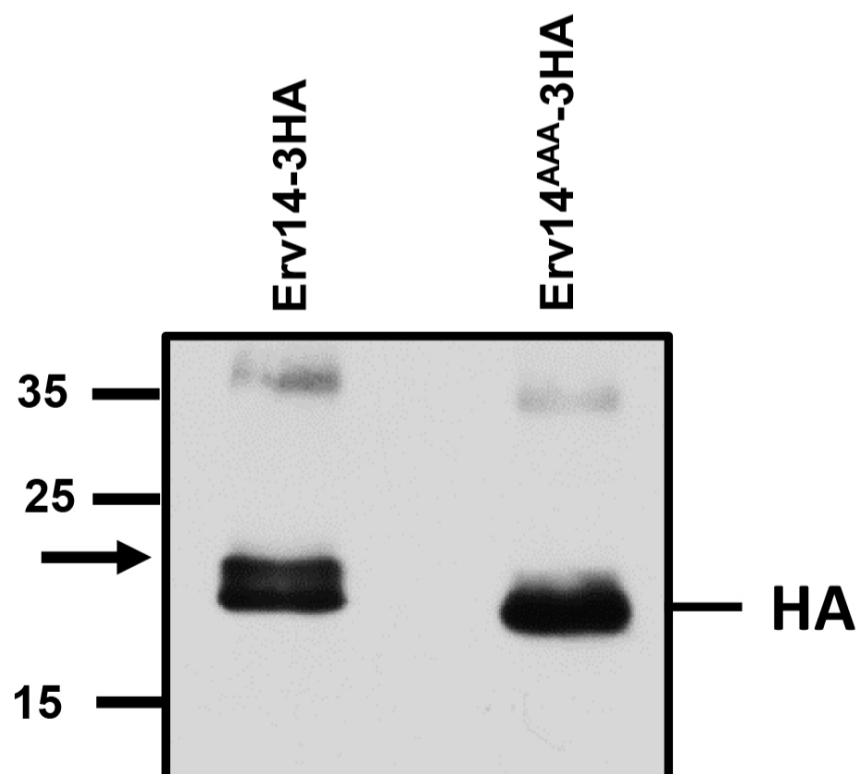

**Fig. S7. Mutations on the phosphorylation domain prevent the modification of Erv14.** Blot from the P13 fraction showed an additional band in the WT protein (Erv14-3HA; arrow) that disappeared by elimination of the acidic amino acids required for the establishment of the phosphorylation domain (Erv14<sup>AAA</sup>-3HA).

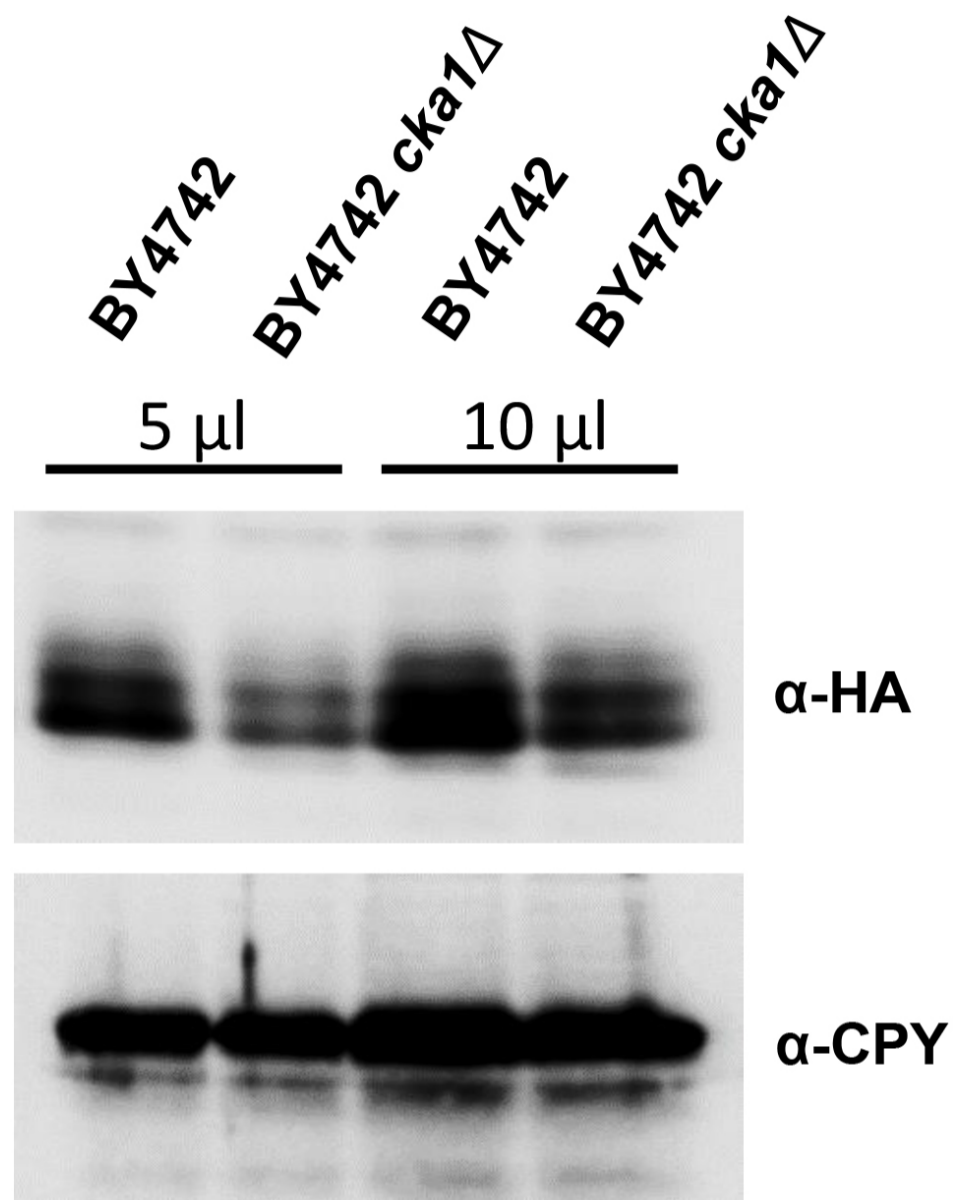

**Fig. S8. Analysis of Erv14 isoforms on the *cka1* $\Delta$  mutant.** Western blot demonstrating the abundance of Erv14-3HA in the microsomal fraction from BY4742 or BY4742*cka1* $\Delta$  cells. Observe the lower abundance of Erv14 when expressed in BY4742*cka1* $\Delta$ . CPY was used as a loading control.



Fig. S9. Blot and data transparency

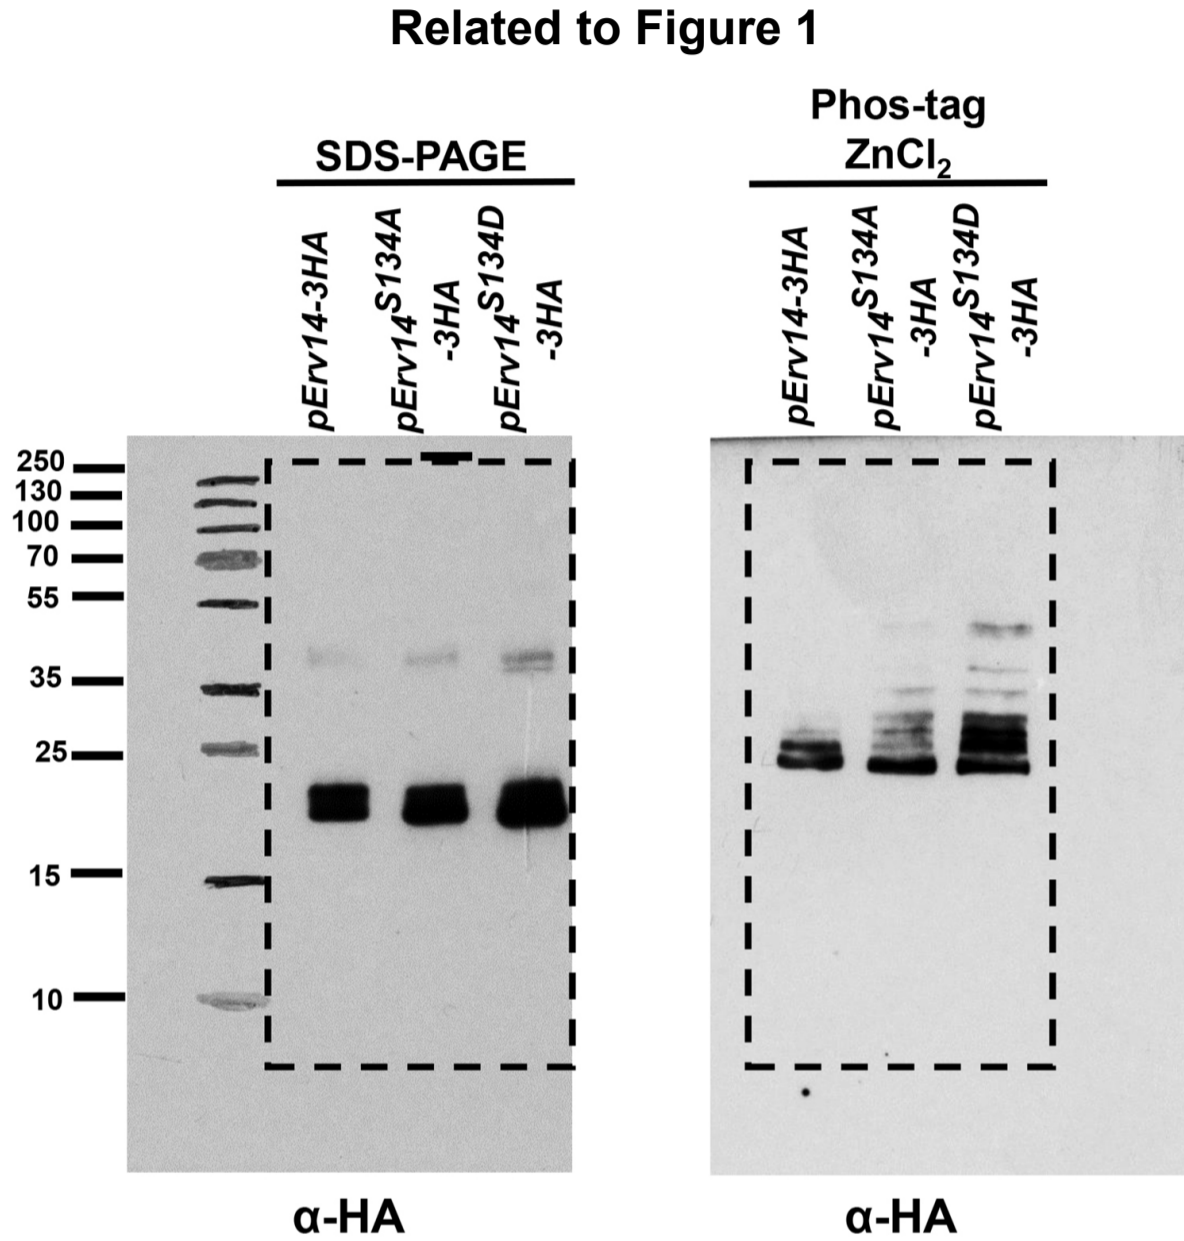

**Blot Transparency:** Blots from HA-tagged Erv14, Erv14<sup>S134A</sup> or Erv14<sup>S134D</sup> expressing cells were separated in SDS-PAGE (left) or Zn(II)-Phos-tag (right) gels. Anti-HA antibody (19 kDa) was used to developed. Dashed inset indicated the cut region used in Figure 7

## Related to Figure 2

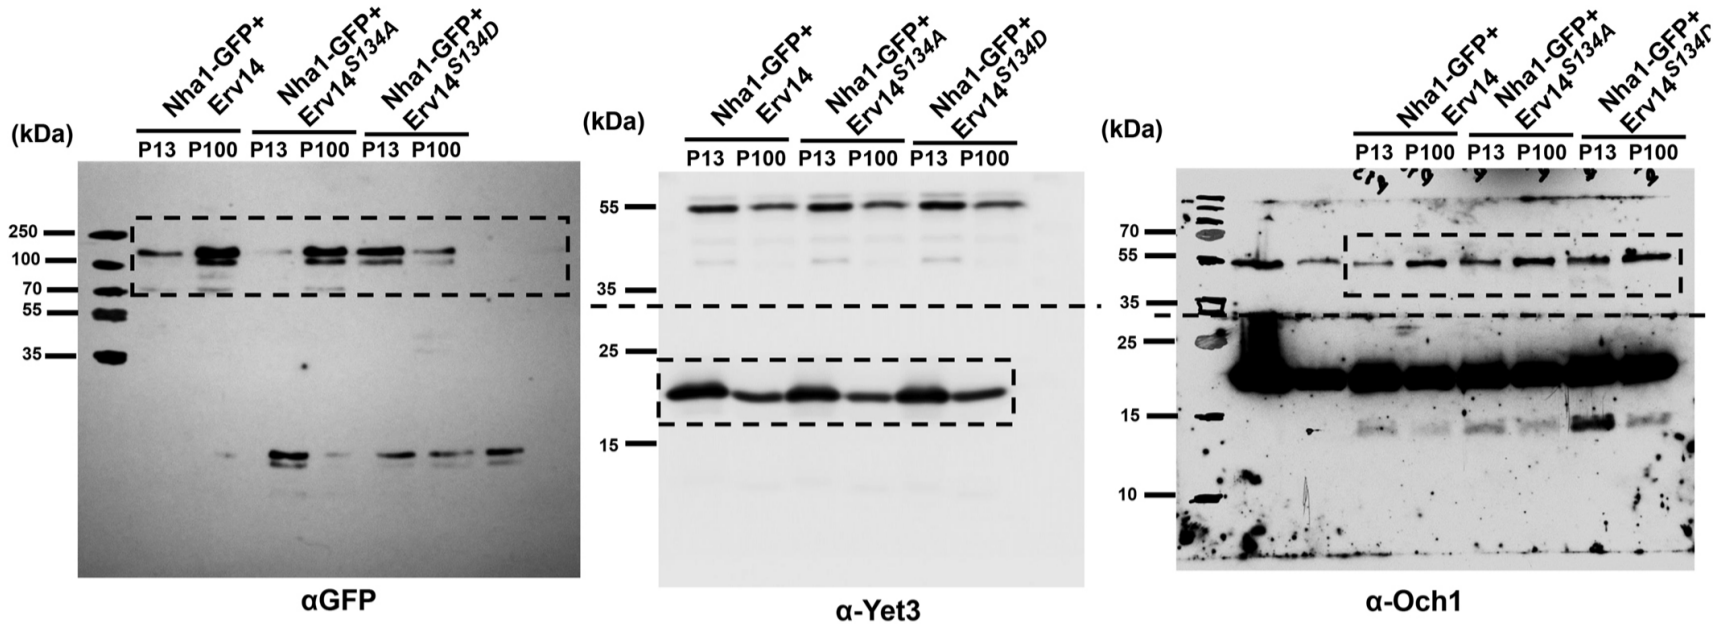

**Blot Transparency: Blots from plasma membrane localization of the Nha1 exchanger in BYT45erv14Δ cells transformed with Wild type pERV14 and point mutations.** Immunoblotting was conducted with Anti-GFP to monitor Nha-GFP (130 kDa). Yet3 (P13) and Och1 (P100) were used as fractionation controls. Dashed line and inset indicated cut regions shown in Figure 1.



## Data Transparency

## Related to Figure 4

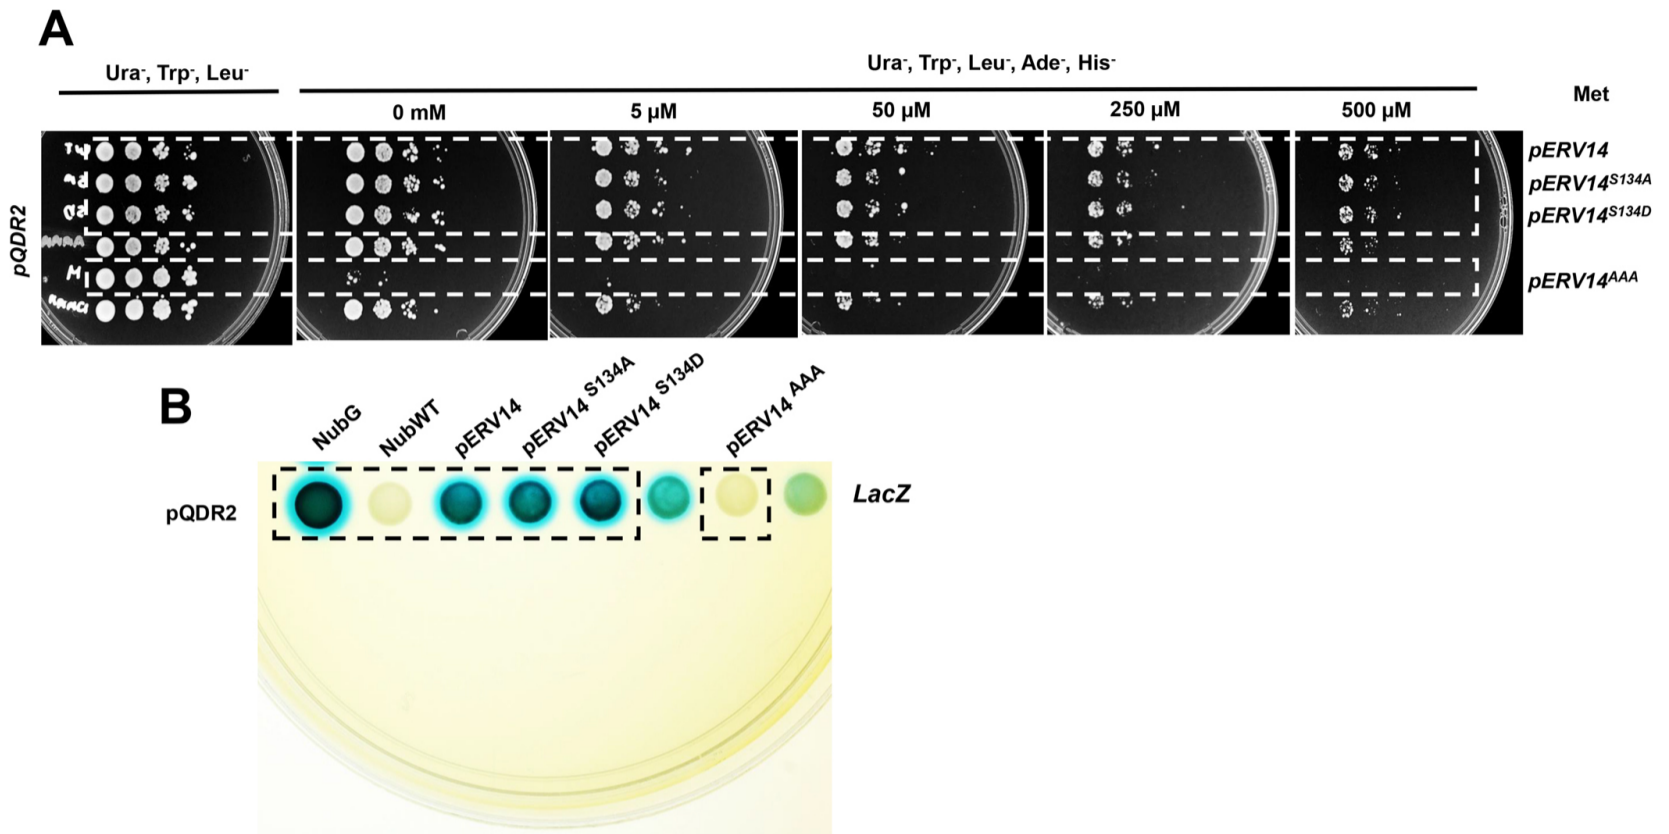

Original images from the mbSUS (A) and LacZ (B) assays. Broken lines enclose the interactions between QDR2 and the Erv14 mutants indicated.

## Related to Figure 5

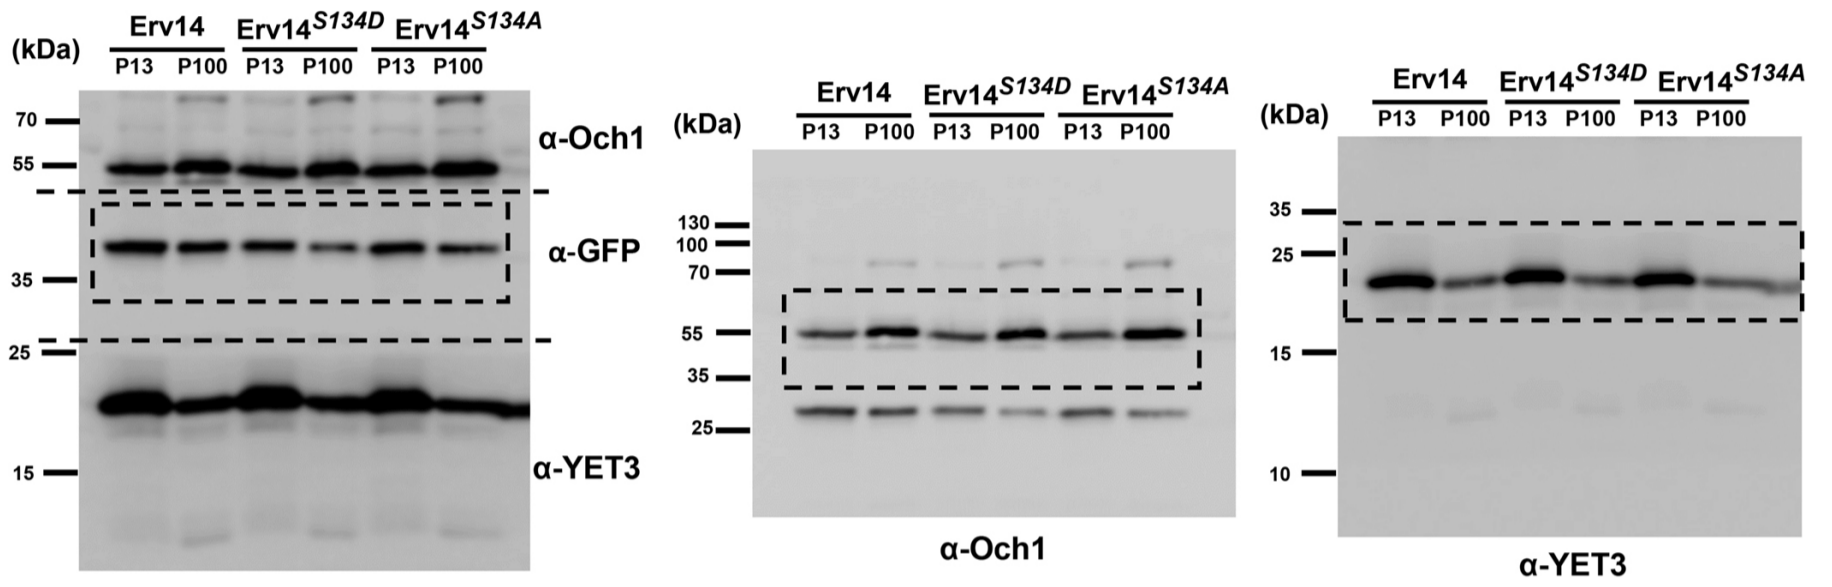

**Table S1.** List of strains used in this study

| <b>Strain</b>      | <b>Genotype</b>                                                                                         | <b>Source</b> |
|--------------------|---------------------------------------------------------------------------------------------------------|---------------|
| BY4741Δerv14       | MATa his3Δ1 leu2Δ0 met15Δ0 ura3Δ0 erv14Δ::KanMx                                                         | Our Lab       |
| BY4741Δerv14Δpdr12 | MATa his3Δ1 leu2Δ0 met15Δ0 ura3Δ0 erv14Δ::loxP pdr12Δ::KanMx                                            | Our Lab       |
| BY4741Δerv14Δqdr2  | MATa his3Δ1 leu2Δ0 met15Δ0 ura3Δ0 erv14Δ::loxP qdr2Δ::KanMx                                             | Our Lab       |
| <i>BYT45erv14Δ</i> | MATa his3Δleu2Δmet15Δura3Δ; nha1Δ::loxP ena1-5Δ::loxP erv14Δ::KanMx                                     | Our Lab       |
| BY4742Δerv14       | MATα his3Δ1 leu2Δ0 lys2Δ0 ura3Δ0 erv14Δ::KanMx                                                          | Barlowe Lab   |
| CBY617 (FY834)     | MATα his3Δ200 ura3-52 lys2Δ202 trp1Δ63 erv14::HIS3 sec23-1                                              | Barlowe Lab   |
| CBY663 (FY834)     | MATα his3Δ200 ura3-52 leu2Δ1 lys2Δ202 erv14::HIS3 sec16-2                                               | Barlowe Lab   |
| CBY603 (FY834)     | MATα his3Δ200 ura3-52 leu2Δ1 lys2Δ202 trp1Δ63 erv14::HIS3 sec13-1                                       | Barlowe Lab   |
| THY.AP4            | MATa ura3 leu2 lexA::lacZ::trp1 lexA::HIS3 lexA::ADE2                                                   | Frommer Lab   |
| THY.AP5            | MATα URA3 leu2 trp1 his3 loxP::ade2                                                                     | Frommer Lab   |
| BW31a              | <i>MATa leu2-3/122 ura3-1 trp1-1 his3-11/15 ade2-1 can1-100 GAL SUC2 mal10 ena1-4Δ::HIS3 nha1::LEU2</i> | Our Lab       |

**Table S2.** Primers used for gene cloning into the Gateway vectors and pGRU1

| Gene                                   | 5'<br>Forward                                                    | 3'<br>Reverse                                                      |
|----------------------------------------|------------------------------------------------------------------|--------------------------------------------------------------------|
| <b>ERV14<sup>S134A</sup>-pDONOR221</b> | GTACAAAAAAGCAGGCTTCATGGGTGCTTGGTTATTTATC                         | GTACAAGAAAGCTGGGTCTGAAGTCATCACCAGCTT<br>CAGCAATC                   |
| <b>ERV14<sup>S134D</sup>-pDONOR207</b> | GTACAAAAAAGCAGGCTTCATGGGTGCTTGGTTATTTATC                         | GTACAAGAAAGCTGGGTCTGAAGTCATCACCATCTTC<br>AGCAATC                   |
| <b>ERV14<sup>S134A</sup>-pGRU1</b>     | GTACATTATAAAAAAAATCCTGAACTTAGCTAGATATTATG<br>GGTGCTTGGTTATTTATCC | TAAAGCTCCGGAGCTTGCATGCCTGCAGGTCGACT<br>CTGAAGTCATCACCAGCTTCAGCAATC |
| <b>ERV14<sup>S134D</sup>-pGRU1</b>     | GTACATTATAAAAAAAATCCTGAACTTAGCTAGATATTATG<br>GGTGCTTGGTTATTTATCC | TAAAGCTCCGGAGCTTGCATGCCTGCAGGTCGACT<br>CTGAAGTCATCACCATCTTCAGCAATC |
